# Supplementary material for: Catchment-scale assessment of drought impact on environmental flow in the Indus Basin, Pakistan
Source: Copernicus journal article supplement (doi:10.5194/nhess-24-2191-2024), 2024-07-01
Supplement: Supplementary file 1 [file nhess-24-2191-2024-supplement.pdf]

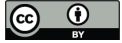

*Supplement of*

## **Catchment-scale assessment of drought impact on environmental flow in the Indus Basin, Pakistan**

**Khalil Ur Rahman et al.**

*Correspondence to:* Songhao Shang (shangsh@tsinghua.edu.cn)

The copyright of individual parts of the supplement might differ from the article licence.

**Table S1.** Kurtosis and Skewness results for precipitation data across different catchments of the Indus Basin

| Catchment      | Kurtosis | Skewness | Catchment                | Kurtosis | Skewness |
|----------------|----------|----------|--------------------------|----------|----------|
| Yogo           | 2.928    | 1.559    | Jhelum River at Mangla   | 3.512    | 1.820    |
| Shatial Bridge | 3.558    | 2.097    | Dhoke Pattan             | 3.914    | 1.894    |
| Hunza          | 3.388    | 1.835    | Tarbela                  | 3.698    | 1.989    |
| Astore         | 3.312    | 1.798    | Indus River at Attock    | 5.955    | 2.029    |
| Gilgit         | 2.793    | 1.924    | Swat                     | 1.633    | 1.204    |
| Chitral        | 3.853    | 1.837    | Panjhora River           | 0.975    | 0.556    |
| Bisham Qila    | 2.915    | 1.594    | Swat River at Chakdara   | 4.054    | 2.007    |
| Domel          | 4.113    | 2.098    | Kabul River at Nowshehra | 2.653    | 1.537    |
| Kunhar         | 3.477    | 1.893    | Bara River               | 2.676    | 1.127    |
| Muzaffarabad   | 3.015    | 1.483    | Kurram River             | 3.019    | 1.692    |
| Siran River    | 2.597    | 1.728    | Massan                   | 2.500    | 1.703    |
| Azad Pattan    | 1.223    | 1.312    | Jhelum River at Jhangi   | 3.459    | 1.895    |
| Jhelum         | 2.713    | 1.966    | Indus River at Sehwan    | 5.559    | 1.984    |
| Soan River     | 2.934    | 1.581    |                          |          |          |

*Note: Following the Hair et al., (2010) and Bryne et al., (2010), the data is normal when skewness and kurtosis ranges between -2 to +2 and -7 to +7, respectively.*

**Table S2.** Kurtosis and Skewness results for temperature data across different catchments of the Indus Basin

| Catchment      | Kurtosis | Skewness | Catchment                | Kurtosis | Skewness |
|----------------|----------|----------|--------------------------|----------|----------|
| Yogo           | -1.345   | 0.071    | Jhelum River at Mangla   | -1.169   | -0.118   |
| Shatial Bridge | -1.274   | -0.131   | Dhoke Pattan             | -1.834   | -0.301   |
| Hunza          | -1.321   | -0.134   | Tarbela                  | -1.343   | -0.105   |
| Astore         | -1.252   | -0.172   | Indus River at Attock    | -1.337   | -0.180   |
| Gilgit         | -1.271   | -0.131   | Swat                     | -1.366   | 0.015    |
| Chitral        | -1.295   | -0.205   | Panjhora River           | -1.278   | -0.202   |
| Bisham Qila    | -1.328   | -0.235   | Swat River at Chakdara   | -1.215   | -0.210   |
| Domel          | -1.318   | -0.108   | Kabul River at Nowshehra | 0.256    | 0.108    |
| Kunhar         | -1.306   | -0.204   | Bara River               | -1.878   | -0.089   |
| Muzaffarabad   | -1.427   | -0.201   | Kurram River             | -1.225   | -0.341   |
| Siran River    | -1.319   | -0.412   | Massan                   | -1.262   | -0.354   |
| Azad Pattan    | -1.174   | -0.133   | Jhelum River at Jhangi   | -1.291   | -0.308   |
| Jhelum         | -1.176   | -0.153   | Indus River at Sehwan    | -1.316   | -0.379   |
| Soan River     | -1.144   | -0.127   |                          |          |          |

*Note: Following the Hair et al., (2010) and Bryne et al., (2010), the data is normal when skewness and kurtosis ranges between -2 to +2 and -7 to +7, respectively.*

**Table S3.** Drought severity ranges.

| <b>Drought class</b> | <b>SPEI</b> |
|----------------------|-------------|
| Extreme drought      | <-2.0       |
| Severe drought       | -2.0 – -1.5 |
| Moderate drought     | -1.5 – -1.0 |
| Near Normal          | -1.0 – 1.0  |
| No drought           | >1.0        |

**References:**

Byrne, B. M. (2010). Structural equation modeling with AMOS: Basic concepts, applications, and programming. New York: Routledge.

Hair, J., Black, W. C., Babin, B. J. & Anderson, R. E. (2010) Multivariate data analysis (7th ed.). Upper Saddle River, New Jersey: Pearson Educational International.
